# Supplementary material for: Nanocomposite scaffolds incorporated with hydrophobically-functionalized mesoporous nanocarriers for the effective loading and long-term delivery of osteogenic drugs
Source: Royal Society of Chemistry journal article supplement (doi:10.1039/c4ra16955g), 2015-01-01
Supplement: c4ra16955g1.pdf [file c4ra16955g1.pdf]

## Supporting information

**Nanocomposite scaffolds incorporated with hydrophobically-functionalized mesoporous nanocarriers for the effective loading and long-term delivery of osteogenic drugs**

Guang-Zhen Jin<sup>a,b,#</sup>, Mohamed Eltohamy<sup>a,b,#</sup>, Hae-Won Kim<sup>a,b,c,\*</sup>

<sup>a</sup>*Department of Nanobiomedical Science & BK21 PLUS NBM Global Research Center for Regenerative Medicine, Dankook University, Republic of Korea*

<sup>b</sup>*Institute of Tissue Regeneration Engineering (ITREN), Dankook University, Republic of Korea*

<sup>c</sup>*Department of Biomaterials Science, School of Dentistry, Dankook University, Republic of Korea*

-----  
# Authors contributed equally to this work

\* Author in correspondence to:

*Prof. Hae-Won Kim: tel) +82 41 550 3081, fax) +82 41 550 3085, e-mail: kimhw@dku.edu*

**Table S1.** Primer sequences of genes related with osteogenesis

| Gene           | Primer sequence                                                  |
|----------------|------------------------------------------------------------------|
| ALP            | (F) 5'-ACTGGTACTCGGACAATGAG-3'<br>(R) 5'-ATCGATGTCCTTGATGTTGT-3' |
| Col I          | (F) 5'-ACAGTCGATTCACCTACAGC-3'<br>(R) 5'-GAGGTCTTGGTGGTTTTGTA-3' |
| OPN            | (F) 5'-ACAAGCAGACGTTTTGACTC-3'<br>(R) 5'-CTTTGACCTCAGTCCGTAAG-3' |
| OCN            | (F) 5'-CTCTCTCTGCTCACTCTGCT-3'<br>(R) 5'-CATGAAGGCTTTGTCAGACT-3' |
| $\beta$ -actin | (F) 5'-ACGTTGACATCCGTAAAGAC-3'<br>(R) 5'-TAATCTCCTTCTGCATCCTG-3' |
